# Supplementary material
Source: PubMed Central journal article supplement (PMC8856839)
Supplement: NIHMS1774309-supplement-figure_s1.pdf [file NIHMS1774309-supplement-figure_s1.pdf]

Figure S1: PQ-BC scores by ASD status

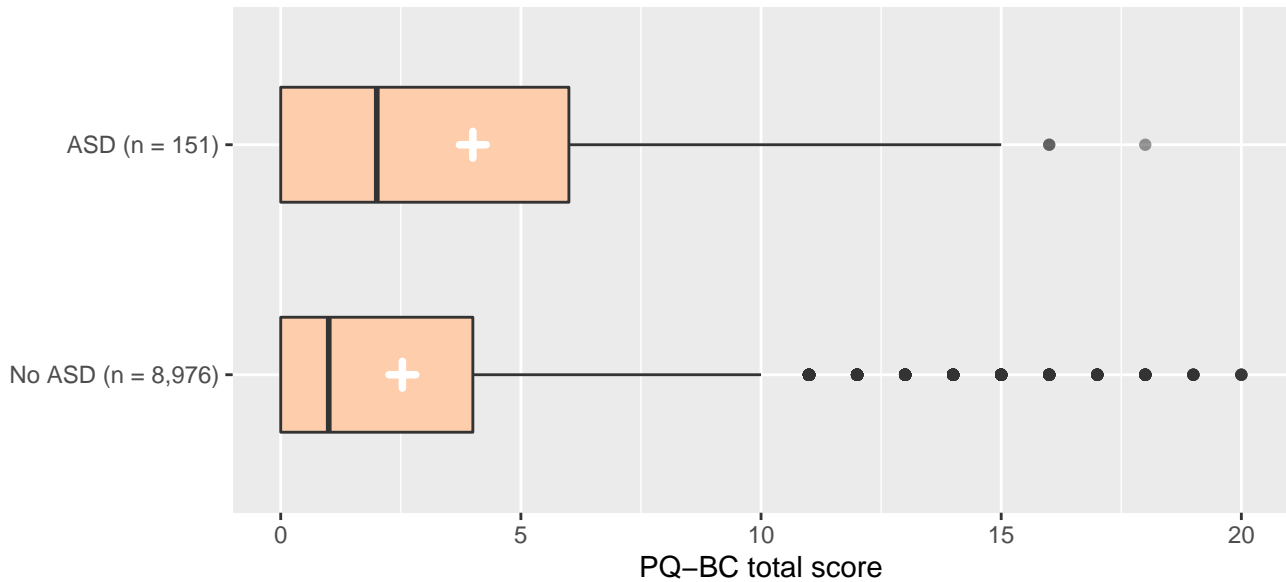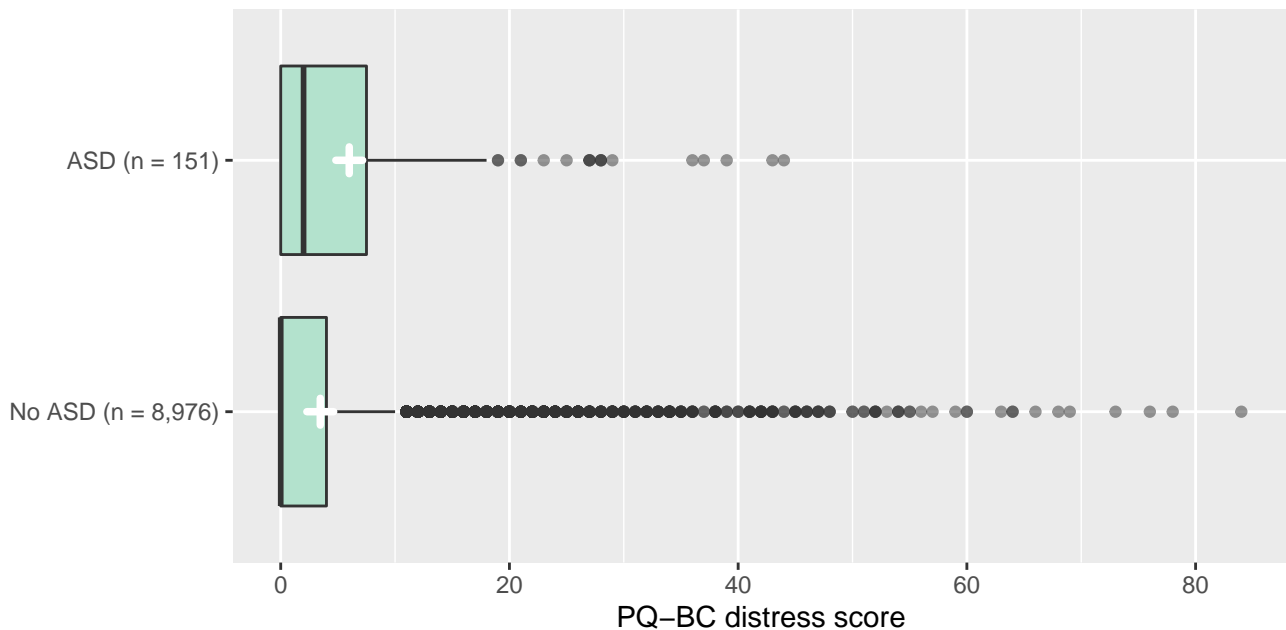

Boxplots of PQ-BC total and distress scores in participants with and without ASD. + represents the mean.
