# Supplementary material
Source: PubMed Central journal article supplement (PMC8856839)
Supplement: NIHMS1774309-supplement-figure_s2.pdf [file NIHMS1774309-supplement-figure_s2.pdf]

Figure S2: NIH Toolbox cognitive measures by ASD status

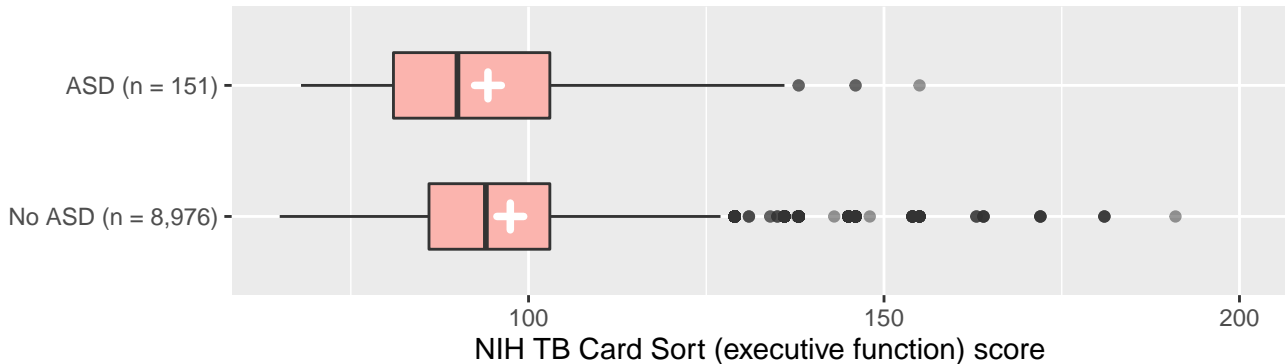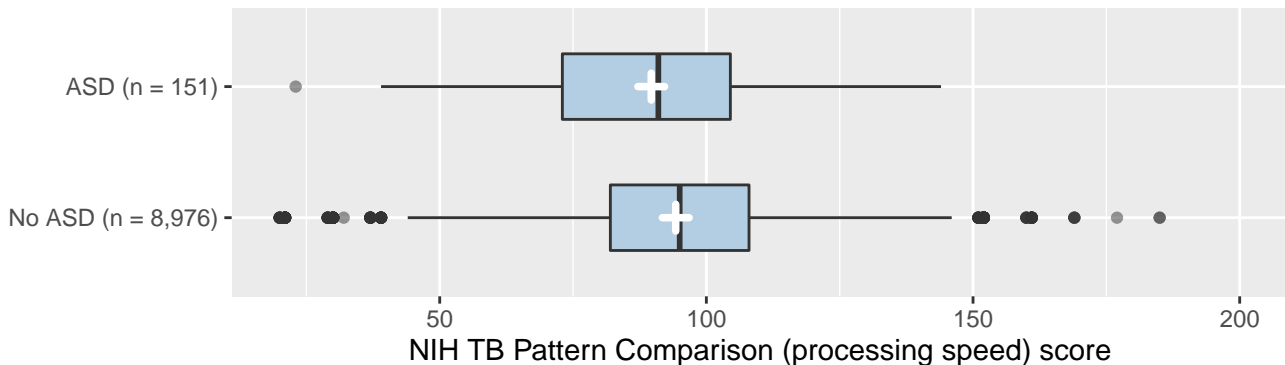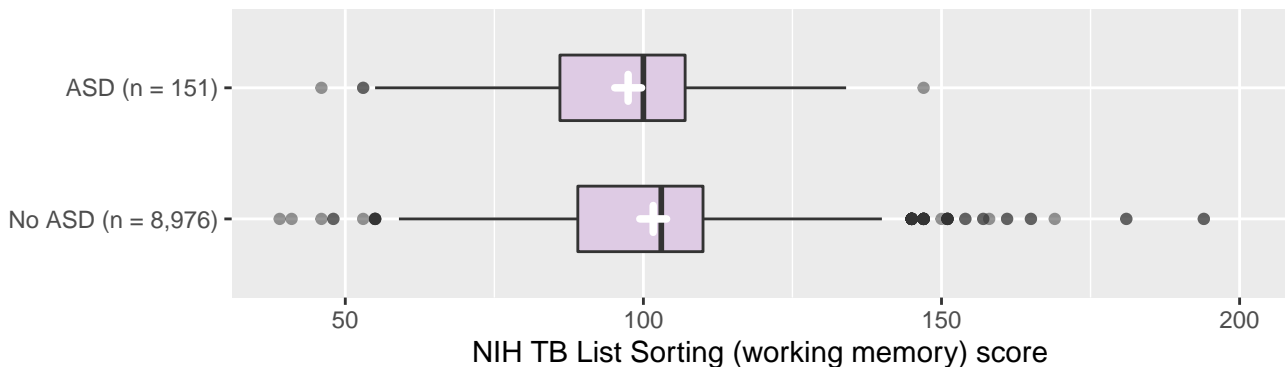

Boxplots of NIH Toolbox scores in participants with and without ASD. + represents the mean.
